# Supplementary material for: Development of a potential LPG sensor based on a PANI–Co3O4 nanocomposite that functions at room temperature
Source: Royal Society of Chemistry journal article supplement (doi:10.1039/c9nj03940f), 2019-01-01
Supplement: c9nj03940f1.pdf [file c9nj03940f1.pdf]

**Table S1**

| <b>S. No.</b> | <b>Material</b>                               | <b>Target Gas</b> | <b>Reference</b> |
|---------------|-----------------------------------------------|-------------------|------------------|
| 1.            | $\text{Co}_3\text{O}_4$                       | Ethanol           | 24               |
| 2.            | $\text{Co}_3\text{O}_4$                       | Acetone           | 25               |
| 3.            | $\text{Co}_3\text{O}_4$                       | Formaldehyde      | 27               |
| 4.            | $\text{Co}_3\text{O}_4$                       | $\text{NH}_3$     | 28               |
| 5.            | $\text{Co}_3\text{O}_4$                       | CO                | 29               |
| 6.            | $\text{ZnO}/\text{Co}_3\text{O}_4$            | Ethanol           | 31               |
| 7.            | $\text{TiO}_2/\text{Co}_3\text{O}_4$          | CO                | 32               |
| 8.            | $\text{Fe}_3\text{O}_4/\text{Co}_3\text{O}_4$ | Acetone           | 33               |

Cobalt oxide and its composites for sensing of different gases
